# Supplementary material for: Human-Centred Indicators (HCI) to Regenerate Vulnerable Cultural Heritage and Landscape towards a Circular City: From the Bronx (NY) to Ercolano (IT)
Source: MDPI journal article supplement (doi:10.3390/su13105505), 2021-05-14
Supplement: s1 [file s1]

Archive with 1 entries (1 files):
- sustainability-1125065-supplementary.pdf
