# Supplementary material for: Human-Centred Indicators (HCI) to Regenerate Vulnerable Cultural Heritage and Landscape towards a Circular City: From the Bronx (NY) to Ercolano (IT)
Source: MDPI journal article supplement (doi:10.3390/su13105505), 2021-05-14
Supplement: s1 [file s1 › sustainability-1125065-supplementary.pdf]

**Table S1.** Questions submitted to the sample of stakeholders from Ercolano and the Bronx for the identification of the vulnerabilities and waste conditions defined as “Negative Common Contact Points (NCCP)”.

| THEORETICAL BACKGROUND                                                                                                                                                                                                                                                                                                                  |                                                                                                                                                                                                                                                                                                                                      |                                                                                 |
|-----------------------------------------------------------------------------------------------------------------------------------------------------------------------------------------------------------------------------------------------------------------------------------------------------------------------------------------|--------------------------------------------------------------------------------------------------------------------------------------------------------------------------------------------------------------------------------------------------------------------------------------------------------------------------------------|---------------------------------------------------------------------------------|
| <b>Q1. In your opinion, have the development strategies of the last 15 years been able to include and consider different sectors? Q1.1 Do you believe they have been formulated from a whole development perspective or do you think they have been defined to favor the specific interests of determined sectors?</b>                  |                                                                                                                                                                                                                                                                                                                                      | <b>NCCP_A</b> - Consumerism policy and capitalistic economic management         |
| <b>AE1.</b> 62% of respondents felt that development strategies were fragmented and <b>AE1.1</b> formulated to favor the short-term interests of specific sectors without considering overall long-term planning.                                                                                                                       | <b>AB1.</b> 76% of respondents felt that development strategies were fragmented and <b>AE1.1</b> formulated to favor the short-term interests of specific sectors without considering overall long-term planning.                                                                                                                    | <b>NCCP_B</b> - Modern anthropocentrism                                         |
| <b>Q2. Starting from the above considerations, do you think some sectors should receive more attention in development strategies? If yes, at what scale?</b>                                                                                                                                                                            |                                                                                                                                                                                                                                                                                                                                      | <b>NCCP_C</b> - Different strategies for different sectors and different scales |
| <b>AE2.</b> 57% of the whole sample thought that strategies concerning the protection and enhancement of cultural heritage should be strengthened, and especially those on a local scale, concerning archaeological heritage (especially through the enhancement of activities and services such as the Virtual Archaeological Museum). | <b>AB2.</b> 51% of the whole sample thought that strategies concerning the protection and enhancement of cultural heritage should be strengthened, and especially those on a local scale, concerning historical heritage (especially through the enhancement of activities and services such as the Morris House or 1st Bronx road). |                                                                                 |
| CULTURAL SUB-SYSTEM                                                                                                                                                                                                                                                                                                                     |                                                                                                                                                                                                                                                                                                                                      |                                                                                 |
| <b>Q3. In your opinion, are there any factors preventing the development of the area? Q3.1 If yes, they influence your expectations about the future?</b>                                                                                                                                                                               |                                                                                                                                                                                                                                                                                                                                      |                                                                                 |
| <b>AE3.</b> 73% of respondents said that one of main factors that prevent local development is the widespread degradation at social, cultural, economic and environmental level and <b>AE3.1</b> 46% of them had a 'not at all' positive expectations about the future.                                                                 | <b>AB3.</b> 71% of respondents said that one of main factors that prevent local development is the widespread degradation at social, cultural, economic and <b>AB3.1</b> environmental level and 48% of them had a 'not at all' positive expectations about the future.                                                              | <b>NCCP_D</b> - Destruction of the site's values                                |
| <b>Q4. Is your work based on local traditional skills? Q4.1 If not, did you have to find a job in another district/neighborhood?</b>                                                                                                                                                                                                    |                                                                                                                                                                                                                                                                                                                                      |                                                                                 |

|                                                                                                                                           |                                                                                                                                           |                                                                      |
|-------------------------------------------------------------------------------------------------------------------------------------------|-------------------------------------------------------------------------------------------------------------------------------------------|----------------------------------------------------------------------|
| <b>AE4.</b> 55% state that they have skills that are not based on local knowledge and <b>AE4.1</b> work in other districts/neighborhoods. | <b>AB4.</b> 72% state that they have skills that are not based on local knowledge and <b>AB4.1</b> work in other districts/neighborhoods. | <b>NCCP_E</b> - Import of external know-how and loss of local skills |
|-------------------------------------------------------------------------------------------------------------------------------------------|-------------------------------------------------------------------------------------------------------------------------------------------|----------------------------------------------------------------------|

---

**Q5. Do you have confidence in the effectiveness of projects (planned and/or ongoing) to enhance the local cultural heritage?**

---

|                                                                                                                          |                                                                                                                       |                                                                                 |
|--------------------------------------------------------------------------------------------------------------------------|-----------------------------------------------------------------------------------------------------------------------|---------------------------------------------------------------------------------|
| <b>AE5.</b> 44% of the whole sample had 'a little' confidence in the projects to enhance the Ercolano cultural heritage. | <b>AB5.</b> 64% of the whole sample had 'a little' confidence in the projects to enhance the Bronx cultural heritage. | <b>NCCP_F</b> - Disconnection between the community and local cultural heritage |
|--------------------------------------------------------------------------------------------------------------------------|-----------------------------------------------------------------------------------------------------------------------|---------------------------------------------------------------------------------|

---

**Q6. Do you believe that the economic activities in your district/neighborhood have cultural value?**

---

|                                                                                                         |                                                                                                          |                                                                               |
|---------------------------------------------------------------------------------------------------------|----------------------------------------------------------------------------------------------------------|-------------------------------------------------------------------------------|
| <b>AE6.</b> 54% of the whole sample thought that economic activities in Ercolano had no cultural value. | <b>AB6.</b> 85% of the whole sample thought that economic activities in the Bronx had no cultural value. | <b>NCCP_G</b> - Landscape as a physical reality dominated by economic aspects |
|---------------------------------------------------------------------------------------------------------|----------------------------------------------------------------------------------------------------------|-------------------------------------------------------------------------------|

---

**SOCIAL SUB-SYSTEM**

---



---

**Q7. Do you actively participate in the political life of your district/neighborhood? Q7.1**  
**If not, is the reason your lack of interest or lack of opportunities?**

---

|                                                                                                                                                                                                                                                                                                                                                                                                                                                                                                                          |                                                                                                                                                                                                                                                                                                                                                                                                                                                                                                                           |                                   |
|--------------------------------------------------------------------------------------------------------------------------------------------------------------------------------------------------------------------------------------------------------------------------------------------------------------------------------------------------------------------------------------------------------------------------------------------------------------------------------------------------------------------------|---------------------------------------------------------------------------------------------------------------------------------------------------------------------------------------------------------------------------------------------------------------------------------------------------------------------------------------------------------------------------------------------------------------------------------------------------------------------------------------------------------------------------|-----------------------------------|
| <b>AE7.</b> 52% state that they do not actively participate in the political life of the district/district because they have never had the opportunity to do so.<br><b>AE7.1</b> Among them, 41% state that they have had the opportunity but did not want to continue because of a lack of openness towards the needs of citizens, while 7% claim to participate actively in the political life of the district/neighborhood through associations active in local development, although their needs are not considered. | <b>AB7.</b> 69% state that they do not actively participate in the political life of the district/district because they have never had the opportunity to do so.<br><b>AB7.1</b> Among them, 21% state that they have had the opportunity but did not want to continue because of a lack of openness towards the needs of citizens, while 10% claim to participate actively in the political life of the district/neighborhood through associations active in local development, although their needs are not considered. | <b>NCCP_H</b> - Top-down approach |
|--------------------------------------------------------------------------------------------------------------------------------------------------------------------------------------------------------------------------------------------------------------------------------------------------------------------------------------------------------------------------------------------------------------------------------------------------------------------------------------------------------------------------|---------------------------------------------------------------------------------------------------------------------------------------------------------------------------------------------------------------------------------------------------------------------------------------------------------------------------------------------------------------------------------------------------------------------------------------------------------------------------------------------------------------------------|-----------------------------------|

---

**Q8. Have you ever been involved by local authorities to contribute to decision-making processes concerning development strategies in your district/neighborhood?**

---

**AE8.** 63% of interviewed say they have never contributed to decision-making processes and, among them, 26% emphasize the need to increase association spaces to favor the enhancement of a shared vision about future development strategies.

**AB8.** 43% of interviewed say they have never contributed to decision-making processes and, among them, 67% emphasize the need to increase association spaces to favor the enhancement of a shared vision about future development strategies.

**NCCP\_I** - Exclusion of community needs in decision making process

**NCCP\_J** - Lack of defined responsibilities in decision making process

**Q9. In your free time, do you engage in activities that have a positive impact on the community and that enhance local culture?**

**AE9.** 28% of respondents are engaged in activities aimed to promote inclusiveness (13% of them) and to enhance local culture (18%).

**AB9.** 65% of respondents are engaged in activities aimed to promote inclusiveness (45% of them) and to enhance local culture (20%).

**NCCP\_K** - Marginalization of different cultures and loss of local cultural identity

**Q10. Do you think that the presence of foreigners negatively affects the community?**

**AE10.** 40% of respondents felt that the presence of foreigners negatively affects the community and, among them, 20% highlights that it is "much" and 8% "very much".

**AB10.** 21% of respondents felt that the presence of foreigners negatively affects the community and, among them, 12% highlights that it is "much" and 8% "very much".

**Q11. Do you feel safe where you live?**

**AE11.** 25% of respondents say they feel unsafe in the area where they live.

**AB11.** 70% of respondents say they feel unsafe in the area where they live.

**NCCP\_M** - Unsafety and unemployment rate

**Q12. Do you have a stable job?**

**AE12.** 55% of the whole sample stated that they had no job stability.

**AB12.** 72% of the whole sample stated that they had no job stability.

**Q13. What is the most common type of degradation in the area where you live?**

**AE13.** 58% of respondents stated that the most widespread decay in the area relates to a high rate of poverty and unemployment.

**AB13.** 63% of respondents stated that the most widespread decay in the area relates to a high rate of poverty and unemployment.

#### ECONOMIC SUB-SYSTEM

**Q14. Do you have confidence in the cooperative relationship between citizens and institutions (at local level)?**

**AE14.** 35% of the entire sample had little trust in the collaborative relationship between citizens and institutions (at local level).

**AB14.** 28% of the entire sample had little trust in the collaborative relationship between citizens and institutions (at local level).

**NCCP\_O** - Lack of trust in the cooperative relationship between citizens and institutions

**Q15. Do you feel that the institutions pay attention to the problems of the area where you live?**

**AE15.** 73% of respondents say that the institutions don't pay attention to the problems of the area.

**AB15.** 64% of respondents say that the institutions don't pay attention to the problems of the area.

**Q16. Do you actively participate in the social life of your district/neighborhood? Q16.1 If yes, are you a member of one or more associations?**

**AE16.** 35% of respondents declare that they participate in the social life of the district/neighborhood.

**AB16.** 67% of respondents declare that they participate in the social life of the district/neighborhood.

**AE16.1** Among them, 28% is a member of an association for local development.

**AB16.1** Among them, 48% is a member of an association for local development.

**NCCP\_L** - Scarce availability to collaboration into the process

**Q17. Are you willing to invest in improving the quality of life in the area where you live? Q17.1 If you are one of those who answered "quite a lot", "much" or "very much", could you indicate how you would prefer to do this (money, time or expertise)?**

**NCCP\_P** - Economic interests as drive of development

**AE17.** Among those who declare themselves 'quite a lot' (45%), 'much' (39%) or 'very much' (2%) willing to contribute to improving the quality of life, **AE17.1** only 15% are willing to invest money while the others prefer to invest only time (45%) and skills (40%) because there is no economic return.

**AB17.** Among those who declare themselves 'quite a lot' (61%), 'much' (37%) or 'very much' (2%) willing to contribute to improving the quality of life, **AB17.1** only 5% are willing to invest money while the others prefer to invest only time (45%) and skills (50%) because there is no economic return.

**NCCP\_Q** - Capitalist economy

**Q18. Is your income constant? Q18.1 What is your monthly income range?**

**AE18.** 41% of the whole sample have an inconstant income and **AE18.1** had a monthly income between 100€ and 500€.

**AB18.** 54% of the whole sample have an inconstant income and **AB18.1** had a monthly income between 100\$ and 500\$.

**NCCP\_R** - Subsistence economy

**Q19. How long have you been working? Q19.1 Have you or your entrepreneurs introduced innovative elements into your business model in the last 10 years?**

|                                                                                                                                                                                                                                      |                                                                                                                                                                                                                                          |                                              |
|--------------------------------------------------------------------------------------------------------------------------------------------------------------------------------------------------------------------------------------|------------------------------------------------------------------------------------------------------------------------------------------------------------------------------------------------------------------------------------------|----------------------------------------------|
| <b>AE19.</b> 42% of the whole sample have been working as merchants for more than 10 years and <b>AE19.1</b> state that they have not introduced any innovative elements into their business model in the last 10 years of activity. | <b>AB19.</b> 49% of the whole sample have been working as factory workers for more than 10 years and <b>AB19.1</b> their entrepreneurs have not introduced any innovative elements into business model in the last 10 years of activity. | <b>NCCP_S</b> - "Business as usual" dynamics |
|--------------------------------------------------------------------------------------------------------------------------------------------------------------------------------------------------------------------------------------|------------------------------------------------------------------------------------------------------------------------------------------------------------------------------------------------------------------------------------------|----------------------------------------------|

---

## ENVIRONMENTAL SUB-SYSTEM

---

### **Q20. Are you satisfied with the quality of your environment?**

|                                                                                                       |                                                                                                       |                                                                             |
|-------------------------------------------------------------------------------------------------------|-------------------------------------------------------------------------------------------------------|-----------------------------------------------------------------------------|
| <b>AE20.</b> 54% of the entire sample are 'not at all' satisfied with the quality of the environment. | <b>AB20.</b> 68% of the entire sample are 'not at all' satisfied with the quality of the environment. | <b>NCCP_T</b> - Loss of green space and environment quality dissatisfaction |
|-------------------------------------------------------------------------------------------------------|-------------------------------------------------------------------------------------------------------|-----------------------------------------------------------------------------|

### **Q21. Do you think that the area where you live is well connected? Q21.1 If not, what could be improved?**

|                                                                                                                                                                                                                                                                  |                                                                                                                                                                                                                                                                  |
|------------------------------------------------------------------------------------------------------------------------------------------------------------------------------------------------------------------------------------------------------------------|------------------------------------------------------------------------------------------------------------------------------------------------------------------------------------------------------------------------------------------------------------------|
| <b>AE21.</b> 62% of the whole sample stated that the area is not well connected with its surroundings and that <b>AE21.1</b> improvements are needed, especially in public transport (50%), accessibility for disabled people (39%) and pedestrian routes (37%). | <b>AB21.</b> 71% of the whole sample stated that the area is not well connected with its surroundings and that <b>AB21.1</b> improvements are needed, especially in public transport (62%), accessibility for disabled people (41%) and pedestrian routes (35%). |
|------------------------------------------------------------------------------------------------------------------------------------------------------------------------------------------------------------------------------------------------------------------|------------------------------------------------------------------------------------------------------------------------------------------------------------------------------------------------------------------------------------------------------------------|

### **Q22. Do you think that your work negatively influences environmental conditions (produces pollution, creates waste disposal problems, increases the level of urban traffic, etc.)?**

|                                                                                                                                            |                                                                                                                                            |                                                                                          |
|--------------------------------------------------------------------------------------------------------------------------------------------|--------------------------------------------------------------------------------------------------------------------------------------------|------------------------------------------------------------------------------------------|
| <b>AE22.</b> The respondents stated that their work has 'quite a lot' (17%) or 'much' (6%) negative influence on environmental conditions. | <b>AB22.</b> The respondents stated that their work has 'quite a lot' (56%) or 'much' (9%) negative influence on environmental conditions. | <b>NCCP_U</b> - High waste production<br><br><b>NCCP_V</b> - Worsening of climate change |
|--------------------------------------------------------------------------------------------------------------------------------------------|--------------------------------------------------------------------------------------------------------------------------------------------|------------------------------------------------------------------------------------------|

### **Q23. Do you think that your work has a positive influence on environmental conditions (reduces waste production, walking, cycling, public transport)?**

|                                                                                                                                                |                                                                                                                                                |                                      |
|------------------------------------------------------------------------------------------------------------------------------------------------|------------------------------------------------------------------------------------------------------------------------------------------------|--------------------------------------|
| <b>AE23.</b> The respondents stated that their work has 'not at all' (25%) or 'a little' (27%) positive influence on environmental conditions. | <b>AB23.</b> The respondents stated that their work has 'not at all' (21%) or 'a little' (34%) positive influence on environmental conditions. | <b>NCCP_X</b> - Pollutant activities |
|------------------------------------------------------------------------------------------------------------------------------------------------|------------------------------------------------------------------------------------------------------------------------------------------------|--------------------------------------|

### **Q24. Do you think that in the area where you live some functions should be integrated which are not present today? Q24.1 If yes, which ones?**

---

|                                                                                                                            |                                                                                                                            |                                                                     |
|----------------------------------------------------------------------------------------------------------------------------|----------------------------------------------------------------------------------------------------------------------------|---------------------------------------------------------------------|
| <b>AE24.</b> 69% of the whole sample highlights the need to integrate green spaces improvement in regeneration strategies. | <b>AB24.</b> 81% of the whole sample highlights the need to integrate green spaces improvement in regeneration strategies. | <b>NCCP_W</b> - Exclusion of green areas in regeneration strategies |
|----------------------------------------------------------------------------------------------------------------------------|----------------------------------------------------------------------------------------------------------------------------|---------------------------------------------------------------------|

**Table S2.** Questions submitted to the sample of decision-makers from Ercolano and the Bronx for the identification of the vulnerabilities and waste conditions defined as “Negative Common Contact Points (NCCP)”.

#### THEORETICAL BACKGROUND

|                                                                                                                                                                                                                                                                                                                                                                                           |                                                                                                                                                                                                                                                                                                                                                                                           |                                                                                 |
|-------------------------------------------------------------------------------------------------------------------------------------------------------------------------------------------------------------------------------------------------------------------------------------------------------------------------------------------------------------------------------------------|-------------------------------------------------------------------------------------------------------------------------------------------------------------------------------------------------------------------------------------------------------------------------------------------------------------------------------------------------------------------------------------------|---------------------------------------------------------------------------------|
| <b>I1. In your opinion, have the development strategies of the last 15 years been able to include and consider different sectors? Do you believe they have been formulated from a whole development perspective or do you think they have been defined to favor the specific interests of determined sectors?</b>                                                                         |                                                                                                                                                                                                                                                                                                                                                                                           | <b>NCCP_A</b> - Consumerism policy and capitalistic economic management         |
| <b>AE1.</b> 65% of respondents felt that development strategies were fragmented and formulated to favor the short-term interests of specific sectors without considering overall long-term planning.                                                                                                                                                                                      | <b>AB1.</b> 86% of respondents felt that development strategies were fragmented and formulated to favor the short-term interests of specific sectors without considering overall long-term planning.                                                                                                                                                                                      | <b>NCCP_B</b> - Modern anthropocentrism                                         |
| <b>I2. Starting from the above considerations, do you think some sectors should receive more attention in development strategies? If yes, at what scale?</b>                                                                                                                                                                                                                              |                                                                                                                                                                                                                                                                                                                                                                                           | <b>NCCP_C</b> - Different strategies for different sectors and different scales |
| <b>AE2.</b> 88% of the whole sample thought that development strategies should be strengthened, especially those on a local scale. In particular, among them, emerges the necessity to increase citizens' awareness raising (45%), to favor the development of an entrepreneurial culture (36%), to valorize and improve existing commercial activities (36%) and tourism services (25%). | <b>AB2.</b> 79% of the whole sample thought that development strategies should be strengthened, especially those on a local scale. In particular, among them, emerges the necessity to increase citizens' awareness raising (61%), to favor the development of an entrepreneurial culture (31%), to valorize and improve existing commercial activities (49%) and tourism services (38%). |                                                                                 |

#### ECONOMIC SUB-SYSTEM

**I3. Do you cooperate with other local authorities of different sectors?**

|                                                                                                                                                  |                                                                                                                                                  |                                                                                                 |
|--------------------------------------------------------------------------------------------------------------------------------------------------|--------------------------------------------------------------------------------------------------------------------------------------------------|-------------------------------------------------------------------------------------------------|
| <p><b>AE3.</b> 63% of respondents collaborate with other local authorities but only 27% collaborate with authorities from different sectors.</p> | <p><b>AB3.</b> 41% of respondents collaborate with other local authorities but only 18% collaborate with authorities from different sectors.</p> | <p><b>NCCP_N</b> - Lack of cooperative relationship between State, market and civil society</p> |
|--------------------------------------------------------------------------------------------------------------------------------------------------|--------------------------------------------------------------------------------------------------------------------------------------------------|-------------------------------------------------------------------------------------------------|

---

**I4. Are activities organized to involve citizens? If so, who organizes them? And what role does the public administration play?**

---

|                                                                                                                                                                                                                                         |                                                                                                                                                                                                                                         |                                                                                                        |
|-----------------------------------------------------------------------------------------------------------------------------------------------------------------------------------------------------------------------------------------|-----------------------------------------------------------------------------------------------------------------------------------------------------------------------------------------------------------------------------------------|--------------------------------------------------------------------------------------------------------|
| <p><b>AE4.</b> 45% of respondents have organized activities as members of local civil society organizations to stimulate the involvement of citizens but, among them, 81% affirms that the public administration is totally absent.</p> | <p><b>AB4.</b> 79% of respondents have organized activities as members of local civil society organizations to stimulate the involvement of citizens but, among them, 87% affirms that the public administration is totally absent.</p> | <p><b>NCCP_O</b> - Lack of trust in the cooperative relationship between citizens and institutions</p> |
|-----------------------------------------------------------------------------------------------------------------------------------------------------------------------------------------------------------------------------------------|-----------------------------------------------------------------------------------------------------------------------------------------------------------------------------------------------------------------------------------------|--------------------------------------------------------------------------------------------------------|

---

**I5. Do you feel that the institutions pay attention to the problems of the area where you live?**

---

|                                                                                                                                                     |                                                                                                                                                     |
|-----------------------------------------------------------------------------------------------------------------------------------------------------|-----------------------------------------------------------------------------------------------------------------------------------------------------|
| <p><b>AE5.</b> 84% of respondents said they felt there was a lack of institutional attention to the main critical issues for local development.</p> | <p><b>AB5.</b> 96% of respondents said they felt there was a lack of institutional attention to the main critical issues for local development.</p> |
|-----------------------------------------------------------------------------------------------------------------------------------------------------|-----------------------------------------------------------------------------------------------------------------------------------------------------|

---

**I6. What are the main activities that contribute to the local economy? Are they sufficient or do you think the local economy should be based on something else?**

---

|                                                                                                                                                                                                                                                                |                                                                                                                                                                                                                                                             |                                            |
|----------------------------------------------------------------------------------------------------------------------------------------------------------------------------------------------------------------------------------------------------------------|-------------------------------------------------------------------------------------------------------------------------------------------------------------------------------------------------------------------------------------------------------------|--------------------------------------------|
| <p><b>AE6.</b> %79 of respondents highlighted the need to integrate local economy with tourism activities and services (40%), to improve and increase commercial activities (29%) and to orient economic development towards culture-led strategies (33%).</p> | <p><b>AB6.</b> 48% of respondents highlight the need to integrate local economy with tourism activities and services (31%) to improve and increase commercial activities (33%) and to orient economic development towards culture-led strategies (52%).</p> | <p><b>NCCP_R</b> - Subsistence economy</p> |
|----------------------------------------------------------------------------------------------------------------------------------------------------------------------------------------------------------------------------------------------------------------|-------------------------------------------------------------------------------------------------------------------------------------------------------------------------------------------------------------------------------------------------------------|--------------------------------------------|

---
